# Supplementary material
Source: ML conference proceedings conference paper supplement (https://openaccess.thecvf.com/content/WACV2024/html/Yap_Group-Wise_Contrastive_Bottleneck_WACV_2024_paper.html)
Supplement: Supplementary file 1 [file Yap_Group-Wise_Contrastive_Bottleneck_WACV_2024_supplemental.pdf]

## A. Data Preprocessing

All datasets used in the experiments are publicly available. The links to access each dataset are summarized in Table A.2. The data preprocessing of UT Zappos 50k, WIDER Attribute, CUB-200-2011, and ImageNet-100 follows the procedure described in [4], while the data preprocessing of Fitzpatrick17k follows the MEDFAIR framework [7]. The procedures are detailed below for completeness.

**UT Zappos 50k.** The images are resized to 32 x 32 pixels and randomly split into training and testing sets with a 70/30 proportion. To accommodate the small image size, the first 7x7 kernel of ResNet-50 encoder is replaced with a 3x3 kernel and its first max pooling layer is removed.

**WIDER Attribute.** The images are resized to 224 pixels along the shorter side using bilinear interpolation. The dataset is annotated with bounding box-specific attributes. As in [4], the bounding box attributes of each image are merged into an image-level attribute vector via the OR operation. In the experiments, the original training and validation sets are combined into one training set.

**CUB-200-2011.** The images are resized to 224 pixels along the shorter side using bilinear interpolation. The original training and testing sets are used.

**Fitzpatrick17k.** The images are resized to 256 x 256 pixels and randomly split into training/validation/testing sets with a 80/10/10 proportion. As in [7], the "non-neoplastic" and "benign" label is treated as the benign label while the "malignant" label is treated as the malignant label.

**ImageNet-100.** The images are resized to 224 pixels along the shorter side using bilinear interpolation. The training and validation splits are provided in [https://github.com/Crazy-Jack/Cl-InfoNCE/tree/main/data\\_processing/imagenet100/hier](https://github.com/Crazy-Jack/Cl-InfoNCE/tree/main/data_processing/imagenet100/hier). In the hierarchical label experiments, we select the labels from the 5-th and 6-th level of the WordNet hierarchy as the weak labels. The semantic grouping of the labels is given in Table A.1.

| Level 5  | Level 6                                       |
|----------|-----------------------------------------------|
| artifact | covering, instrumentality, structure, surface |
| food     | fare, foodstuff, nutriment, produce           |
| organism | animal, fungus, plant                         |

Table A.1. Coarse-grained labels selected for the hierarchical label experiments.

## B. Data Augmentation

The visual attributes (UT Zappos 50k, WIDER Attribute, CUB-200-2011) and hierarchical labels (ImageNet-100) experiments follow the standard augmentations which include random scaling, cropping, horizontal flipping, and color jittering. The fairness (Fitzpatrick17k) experiment uses random cropping, flipping, and rotation. The images are converted into tensors with values within the range of [0, 1] and normalized using the dataset-specific mean and standard deviation (except for Fitzpatrick17k, which uses statistics computed from ImageNet). The augmentation parameters are given in Table B.1.

## C. Hyperparameter Settings

Except for the pretraining step in Fitzpatrick17k, all remaining experiments were conducted using the same hyperparameter settings as those established in prior works [4, 7]. The specific hyperparameters used in the pretraining and downstream experiments are respectively tabulated in Table C.1 and Table C.2.

## References

- [1] Jia Deng, W. Dong, R. Socher, Li-Jia Li, K. Li, and Li Fei-Fei. Imagenet: A large-scale hierarchical image database. In *Proceedings of the IEEE/CVF Conference on Computer Vision and Pattern Recognition*. IEEE, 2009. 2
- [2] Matthew Groh, Caleb Harris, Luis Soenksen, Felix Lau, Rachel Han, Aerin Kim, Arash Koochek, and Omar Badri. Evaluating deep neural networks trained on clinical images in dermatology with the fitzpatrick 17k dataset. In *Proceedings of the IEEE/CVF Conference on Computer Vision and Pattern Recognition*, pages 1820–1828, 2021. 2
- [3] Yining Li, Chen Huang, Chen Change Loy, and Xiaoou Tang. Human attribute recognition by deep hierarchical contexts. In *European Conference on Computer Vision*, 2016. 2
- [4] Yao-Hung Hubert Tsai, Tianqin Li, Weixin Liu, Peiyuan Liao, Ruslan Salakhutdinov, and Louis-Philippe Morency. Learning weakly-supervised contrastive representations. In *International Conference on Learning Representations*, 2022. 1
- [5] C. Wah, S. Branson, P. Welinder, P. Perona, and S. Belongie. The caltech-ucsd birds-200-2011 dataset. Technical Report CNS-TR-2011-001, California Institute of Technology, 2011. 2
- [6] Aron Yu and Kristen Grauman. Fine-grained visual comparisons with local learning. *Proceedings of the IEEE/CVF Conference on Computer Vision and Pattern Recognition*, pages 192–199, 2014. 2
- [7] Yongshuo Zong, Yongxin Yang, and Timothy Hospedales. MEDFAIR: Benchmarking fairness for medical imaging. In *International Conference on Learning Representations*, 2023. 1

| Dataset             | Access link                                                                                                                                                                                                                 |
|---------------------|-----------------------------------------------------------------------------------------------------------------------------------------------------------------------------------------------------------------------------|
| UT Zappos 50k [6]   | <a href="https://vision.cs.utexas.edu/projects/finegrained/utzap50k/">https://vision.cs.utexas.edu/projects/finegrained/utzap50k/</a>                                                                                       |
| WIDER Attribute [3] | <a href="http://mmlab.ie.cuhk.edu.hk/projects/WIDERAttribute.html">http://mmlab.ie.cuhk.edu.hk/projects/WIDERAttribute.html</a>                                                                                             |
| CUB-200-2011 [5]    | <a href="http://www.vision.caltech.edu/datasets/cub_200_2011/">http://www.vision.caltech.edu/datasets/cub_200_2011/</a>                                                                                                     |
| Fitzpatrick17k [2]  | <a href="https://github.com/mattgroh/fitzpatrick17k">https://github.com/mattgroh/fitzpatrick17k</a>                                                                                                                         |
| ImageNet-100 [1]    | Original data: <a href="https://image-net.org/download.php">https://image-net.org/download.php</a><br>Selected 100 classes: <a href="https://github.com/Crazy-Jack/Cl-InfoNCE">https://github.com/Crazy-Jack/Cl-InfoNCE</a> |

Table A.2. Access links to the datasets.

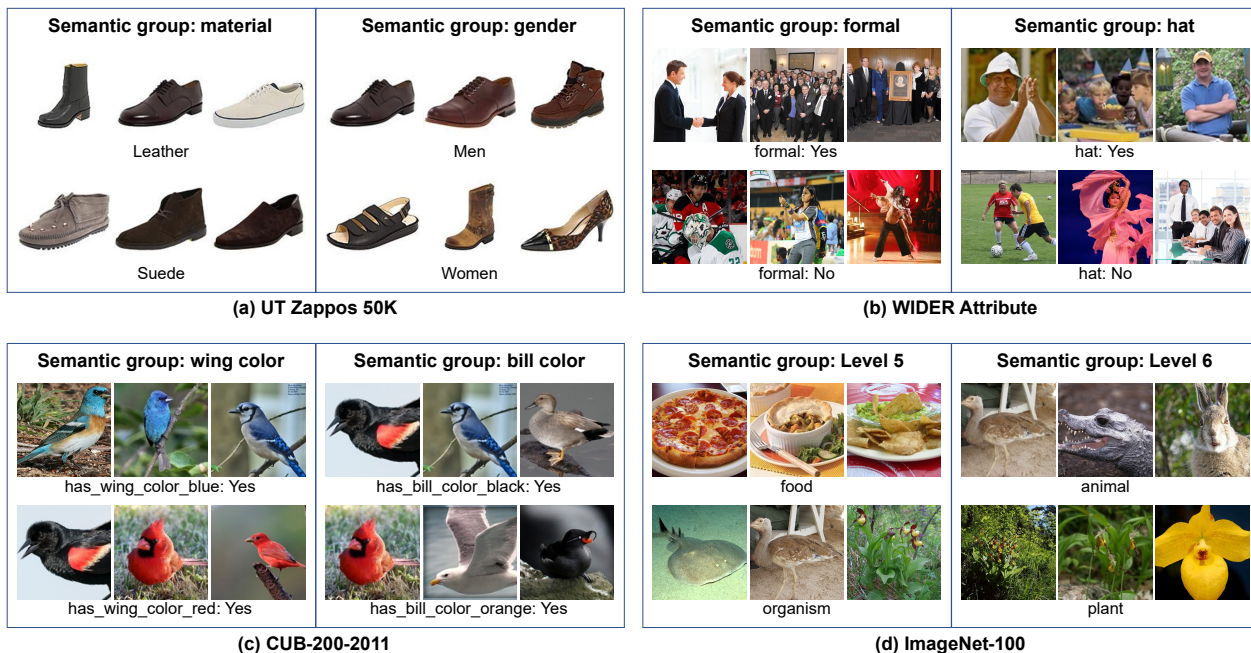

Figure A.1. Visualization of semantic groups for the benchmark datasets. Within each group, the images in the same row share the same visual attribute and form positive pairs with each other in CLRC.

| Parameter                           | Attributes & Hierarchical | Fairness  |
|-------------------------------------|---------------------------|-----------|
| Crop size                           | 224 x 224 / 32 x 32       | 224 x 224 |
| Scaling factor                      | [0.3, 1.0]                | 1.0       |
| Horizontal flipping - probability   | 0.5                       | 0.5       |
| Color jittering - probability       | 0.8                       | -         |
| Color jittering - brightness factor | [0.6, 1.4]                | -         |
| Color jittering - contrast factor   | [0.6, 1.4]                | -         |
| Color jittering - saturation factor | [0.6, 1.4]                | -         |
| Color jittering - hue factor        | [-0.1, 0.1]               | -         |
| Gray scaling - probability          | 0.2                       | -         |
| Rotation - degree                   | -                         | [-15, 15] |

Table B.1. Parameters of data augmentations.

| Parameter               | UT Zappos 50k | WIDER Attribute | CUB-200-2011 | ImageNet-100 | Fitzpatrick17k |
|-------------------------|---------------|-----------------|--------------|--------------|----------------|
| Batch size              | 128           | 40              | 128          | 128          | 512            |
| Optimizer               | SGD           | SGD             | SGD          | SGD          | SGD            |
| Learning rate           | 0.17          | 0.1             | 0.1          | 0.1          | 0.01           |
| Learning rate scheduler | cosine        | cosine          | cosine       | cosine       | cosine         |
| Weight decay            | $1e - 4$      | $1e - 4$        | $1e - 4$     | $1e - 4$     | $1e - 4$       |
| Max epochs              | 1000          | 1000            | 1000         | 200          | 50             |
| Warmup epochs           | 330           | 330             | 330          | 66           | 15             |
| Warmup scheduler        | linear        | linear          | linear       | linear       | linear         |
| Contrastive Temperature | 0.07          | 0.1             | 0.1          | 0.1          | 0.1            |

Table C.1. Hyperparameters used in the pretraining experiments.

| Parameter               | UT Zappos 50k | WIDER Attribute | CUB-200-2011 | ImageNet-100 | Fitzpatrick17k   |
|-------------------------|---------------|-----------------|--------------|--------------|------------------|
| Type                    | linear        | linear          | linear       | linear       | fine-tune        |
| Batch size              | 128           | 40              | 128          | 1024         | 1024             |
| Optimizer               | SGD           | SGD             | SGD          | SGD          | SGD              |
| Learning rate           | 0.3           | 0.3             | 0.3          | 0.4          | 0.001            |
| Learning rate scheduler | cosine        | cosine          | cosine       | cosine       | none             |
| Weight decay            | $1e - 4$      | $1e - 4$        | $1e - 4$     | 0.0          | $1e - 5$         |
| Max epochs              | 100           | 100             | 100          | 90           | until early stop |
| Warmup epochs           | 33            | 33              | 33           | 0            | 0                |
| Warmup scheduler        | linear        | linear          | linear       | none         | none             |

Table C.2. Hyperparameters used in the downstream experiments.
